# Supplementary material for: Rates of COVID-19–Related Outcomes in Cancer Compared With Noncancer Patients
Source: PubMed Central journal article supplement (PMC7853171; doi:10.1093/jncics/pkaa120), 2021-01-21
Supplement: pkaa120_supplementary_data.pdf [file pkaa120_supplementary_data.pdf]

**Supplementary Table 1. Diagnosis Codes Associated with Positive SARS-CoV-2 Polymerase Chain Reaction Tests (N=323)**

| Indication for testing                    | No. of patients (%) |
|-------------------------------------------|---------------------|
| Respiratory symptom or suspected COVID-19 | 163 (71.3)          |
| Fever or chills                           | 8 (3.5)             |
| Loss of taste or smell                    | 5 (2.2)             |
| Preoperative or screening test            | 7 (3.1)             |
| Unknown or other <sup>a</sup>             | 46 (20.1)           |

<sup>a</sup>Patients tested at drive-through testing centers did not have diagnosis codes associated with SARS-CoV-2 Polymerase Chain Reaction Tests
